# Supplementary material for: Association of Inner Retinal Thickness with Prevalent Dementia and Brain Atrophy in a General Older Population: The Hisayama Study
Source: PubMed Central journal article supplement (PMC9559916; doi:10.1016/j.xops.2022.100157), 2022-04-19
Supplement: mmc1.pdf [file mmc1.pdf]

**Supplemental Table 1. The subtypes of dementia among 61 individuals of dementia, 2017**

|                                                                 | n  |
|-----------------------------------------------------------------|----|
| <i>Alzheimer's disease related cases (n=56)</i>                 |    |
| Alzheimer's disease                                             | 52 |
| Mixed type of Alzheimer's disease and vascular dementia         | 3  |
| Mixed type of Alzheimer's disease and dementia with Lewy bodies | 1  |
| <i>Other subtypes of dementia related cases (n=5)</i>           |    |
| Vascular dementia                                               | 2  |
| Dementia with Lewy bodies                                       | 1  |
| Hypoxic ischemic encephalopathy                                 | 1  |
| Frontotemporal lobar degeneration                               | 1  |
