# Supplementary material for: Association of Inner Retinal Thickness with Prevalent Dementia and Brain Atrophy in a General Older Population: The Hisayama Study
Source: PubMed Central journal article supplement (PMC9559916; doi:10.1016/j.xops.2022.100157), 2022-04-19
Supplement: mmc2.pdf [file mmc2.pdf]

**Supplemental Table 2. Odds ratio for the presence of all-cause dementia per every 1 standard deviation decrement in the GC-IPL and RNFL thickness in each of the right and left eyes for the entire eye and for the sectors related to the fovea and optic disc, 2017**

|                                | Right eye                                                                    |          | Left eye                                                                     |          |
|--------------------------------|------------------------------------------------------------------------------|----------|------------------------------------------------------------------------------|----------|
|                                | Multivariable-adjusted <sup>a)</sup> OR (95% CI)<br>per every 1 SD decrement | <i>p</i> | Multivariable-adjusted <sup>a)</sup> OR (95% CI)<br>per every 1 SD decrement | <i>p</i> |
| <b><i>GC-IPL thickness</i></b> |                                                                              |          |                                                                              |          |
| Entire eye                     | 1.62 (1.30 to 2.01)                                                          | < 0.001  | 1.63 (1.31 to 2.01)                                                          | < 0.001  |
| Each sector                    |                                                                              |          |                                                                              |          |
| Superotemporal                 | 1.43 (1.15 to 1.79)                                                          | 0.001    | 1.51 (1.23 to 1.85)                                                          | < 0.001  |
| Superior                       | 1.31 (1.03 to 1.66)                                                          | 0.03     | 1.47 (1.17 to 1.85)                                                          | 0.001    |
| Superonasal                    | 1.50 (1.21 to 1.87)                                                          | < 0.001  | 1.53 (1.23 to 1.91)                                                          | < 0.001  |
| Inferonasal                    | 1.55 (1.25 to 1.92)                                                          | < 0.001  | 1.45 (1.19 to 1.77)                                                          | < 0.001  |
| Inferior                       | 1.53 (1.23 to 1.91)                                                          | < 0.001  | 1.53 (1.23 to 1.90)                                                          | < 0.001  |
| Inferotemporal                 | 1.62 (1.31 to 2.01)                                                          | < 0.001  | 1.45 (1.19 to 1.77)                                                          | < 0.001  |
| <b><i>RNFL thickness</i></b>   |                                                                              |          |                                                                              |          |
| Entire eye                     | 1.26 (0.96 to 1.68)                                                          | 0.10     | 1.19 (0.85 to 1.66)                                                          | 0.31     |
| Each sector                    |                                                                              |          |                                                                              |          |
| Temporal                       | 1.23 (0.90 to 1.69)                                                          | 0.20     | 1.29 (0.88 to 1.91)                                                          | 0.19     |
| Superior                       | 1.20 (0.92 to 1.57)                                                          | 0.18     | 1.10 (0.82 to 1.48)                                                          | 0.51     |
| Nasal                          | 1.12 (0.85 to 1.47)                                                          | 0.43     | 0.74 (0.51 to 1.08)                                                          | 0.12     |
| Inferior                       | 1.35 (0.96 to 1.89)                                                          | 0.10     | 1.30 (0.91 to 1.87)                                                          | 0.15     |

Abbreviations: GC-IPL, ganglion cell-inner plexiform layer; RNFL, retinal nerve fiber layer; SD, standard deviation; OR, odds ratio; CI, confidence interval.

a) The values were adjusted for age, sex, education, systolic blood pressure, use of antihypertensive agents, diabetes, serum total cholesterol, body mass index, cerebrovascular lesions on magnetic resonance imaging, smoking habits, drinking habits, regular exercise, and axial length.
